# Supplementary material for: <strong></strong>Convergent Evolution of Attachment Mechanisms in Aquatic Animals
Source: Preprints.org preprint supplement (doi:10.20944/preprints202203.0324.v1), 2022-03-24
Supplement: Supplementary file 1 [file supplementary]

## Sheet: Table1
Phyla	Representative species	Genus	Common name	Suction, Aquatic bioadhesive or terrestrial bioadhesive	Type of adhesion (Permanent, Transitory, Temporary, instantaneous)	Primary function (Maintenance of position, locomotion, building, feeding, defense)	Level of understanding	Evidences	Citations	Full reference
Annelida	Phragmatopoma californica	Phragmatopoma	Sandcastle worm	Aquatic bioadhesive	Permanent	Building (shelter)	High	Biochemistry + Transcriptome + ISH + IHC	Waite et al. 1992; Endrizzi & Stewart 2009, Wang and Stewart 2012	Waite, J. H., Jensen, R. A., & Morse, D. E. (1992). Cement precursor proteins of the reef-building polychaete Phragmatopoma californica (Fewkes). Biochemistry, 31(25), 5733-5738.; Endrizzi, B. J., & Stewart, R. J. (2009). Glueomics: an expression survey of the adhesive gland of the sandcastle worm. The Journal of Adhesion, 85(8), 546-559. Wang, C. S., & Stewart, R. J. (2012). Localization of the …
Annelida	Phragmatopoma caudata	Phragmatopoma	Sandcastle worm	Aquatic bioadhesive	Permanent	Building (shelter)	Medium	Transcriptome	Buffet et al. 2018	Buffet, J. P., Corre, E., Duvernois-Berthet, E., Fournier, J., & Lopez, P. J. (2018). Adhesive gland transcriptomics uncovers a diversity of genes involved in glue formation in marine tube-building polychaetes. Acta biomaterialia, 72, 316-328.
Annelida	Sabellaria alveolata	Sabellaria	Honeycomb reef worm	Aquatic bioadhesive	Permanent	Building (shelter)	High	qPCR/ microarray + Transcriptome	Becker et al. 2012; Buffet et al.2018	Becker, P. T., Lambert, A., Lejeune, A., Lanterbecq, D., & Flammang, P. (2012). Identification, characterization, and expression levels of putative adhesive proteins from the tube-dwelling polychaete Sabellaria alveolata. The Biological Bulletin, 223(2), 217-225. Buffet, J. P., Corre, E., Duvernois-Berthet, E., Fournier, J., & Lopez, P. J. (2018). Adhesive gland transcriptomics uncovers a diversi…
Annelida	Protodrilus sp., Saccocirrus sp.		Archiannelids	Aquatic bioadhesive	Temporary	Maintenance of position	Medium	Morphology	Martin 1978	Martin, G. G. (1978). The duo-gland adhesive system of the archiannelids Protodrilus and Saccocirrus and the turbellarian Monocelis. Zoomorphologie, 91(1), 63-75.
Annelida	Cambarincola fallax		Clitellata, branchiobdellid	Aquatic bioadhesive	Temporary	Maintenance of position	Medium	Morphology	Gelder and Rowe 1988	Gelder, S. R., & Rowe, J. P. (1988). Light microscopical and cytochemical study on the adhesive and epidermal gland cell secretions of the branchiobdellid Cambarincola fallax (Annelida: Clitellata). Canadian Journal of Zoology, 66(9), 2057-2064.
Annelida	Sabellaria alveolata and other species of sendentary polychaetes		Tubeworms	Aquatic bioadhesive	Transitory	Feeding	Medium	Morphology	Dubois et al. 2005	Dubois, S., Barillé, L., Cognie, B., & Beninger, P. G. (2005). Particle capture and processing mechanisms in Sabellaria alveolata (Polychaeta: Sabellariidae). Marine Ecology Progress Series, 301, 159-171.
Arthropoda	Amphibalanus amphitrite	Amphibalanus	Barnacle	Aquatic bioadhesive	Permanent	Maintenance of position	High	qPCR/ microarray + Transcriptome + Proteome	Chen et al. 2011; Wang et al. 2015; Zhang et al. 2015; So et al. 2017	Chen, Z. F., Matsumura, K., Wang, H., Arellano, S. M., Yan, X., Alam, I., ... & Qian, P. Y. (2011). Toward an understanding of the molecular mechanisms of barnacle larval settlement: a comparative transcriptomic approach. PloS one, 6(7), e22913. Wang, Z., Leary, D. H., Liu, J., Settlage, R. E., Fears, K. P., North, S. H., ... & Spillmann, C. M. (2015). Molt-dependent transcriptomic analysis of ce…
Arthropoda	Lepas anatifera	Lepas	Barnacle	Aquatic bioadhesive	Permanent	Maintenance of position	High	Proteome + Transcriptome	Jonker et al. 2014; Machado et al.2019; Engel et al. 2021	Jonker, J. L., Morrison, L., Lynch, E. P., Grunwald, I., von Byern, J., & Power, A. M. (2015). The chemistry of stalked barnacle adhesive (Lepas anatifera). Interface focus, 5(1), 20140062. Machado, A. M., Sarropoulou, E., Castro, L. F. C., Vasconcelos, V., & Cunha, I. (2019). An important resource for understanding bio-adhesion mechanisms: Cement gland transcriptomes of two goose barnacles, Poll…
Arthropoda	Pollicipes pollicipes	Pollicipes	Barnacle	Aquatic bioadhesive	Permanent	Maintenance of position	High	qPCR/ microarray + Proteome + Transcriptome	Jonker et al. 2014; Machado et al.2019; Rocha et al. 2019; Domínguez-Pérez et al. 2020	Rocha, M., Antas, P., Castro, L. F. C., Campos, A., Vasconcelos, V., Pereira, F., & Cunha, I. (2019). Comparative analysis of the adhesive proteins of the adult stalked goose barnacle Pollicipes pollicipes (Cirripedia: Pedunculata). Marine Biotechnology, 21(1), 38-51.Jonker, J. L., Morrison, L., Lynch, E. P., Grunwald, I., von Byern, J., & Power, A. M. (2015). The chemistry of stalked barnacle ad…
Arthropoda	Tetraclita japonica formosana	Tetraclita	Barnacle	Aquatic bioadhesive	Permanent	Maintenance of position	Medium	qPCR/microarray + Transcriptome	Lin et al. 2014	Lin, H. C., Wong, Y. H., Tsang, L. M., Chu, K. H., Qian, P. Y., & Chan, B. K. (2014). First study on gene expression of cement proteins and potential adhesion-related genes of a membranous-based barnacle as revealed from Next-Generation Sequencing technology. Biofouling, 30(2), 169-181.
Arthropoda	Balanus improvisus	Balanus	Barnacle	Aquatic bioadhesive	Permanent	Maintenance of position	Medium	Transcriptome	Abramova et al. 2019	Abramova, A., Alm Rosenblad, M., Blomberg, A., & Larsson, T. A. (2019). Sensory receptor repertoire in cyprid antennules of the barnacle Balanus improvisus. PloS one, 14(5), e0216294.
Arthropoda	Megabalanus volcano	Megabalanus	Barnacle	Aquatic bioadhesive	Permanent	Maintenance of position	High	Transcriptome + Proteome	Yan et al. 2020	Yan, G., Sun, J., Wang, Z., Qian, P. Y., & He, L. (2020). Insights into the Synthesis, Secretion and Curing of Barnacle Cyprid Adhesive via Transcriptomic and Proteomic Analyses of the Cement Gland. Marine drugs, 18(4), 186.
Arthropoda	Dolomedes triton	Dolomedes	Spider	Aquatic bioadhesive	Permanent	Feeding	High	Transcriptome + Proteome	Correa-Garhwal et al. 2019	Correa‐Garhwal, S. M., Chaw, R. C., Dugger, T., Clarke III, T. H., Chea, K. H., Kisailus, D., & Hayashi, C. Y. (2019). Semi‐aquatic spider silks: transcripts, proteins, and silk fibres of the fishing spider, Dolomedes triton (Pisauridae). Insect molecular biology, 28(1), 35-51.
Arthropoda	Hesperophylax occidentalis	Hesperophylax	Caddisfly larvae	Aquatic bioadhesive	Permanent	Building (shelter)		Proteome	Wang et al.2014	Wang, C. S., Ashton, N. N., Weiss, R. B., & Stewart, R. J. (2014). Peroxinectin catalyzed dityrosine crosslinking in the adhesive underwater silk of a casemaker caddisfly larvae, Hysperophylax occidentalis. Insect biochemistry and molecular biology, 54, 69-79.
Arthropoda	Stenopsyche marmorata	Stenopsyche	Caddisfly larvae	Aquatic bioadhesive	Permanent	Feeding, building shelter		Transcriptome	Nomura et al. 2016	Nomura, T., Ito, M., Kanamori, M., Shigeno, Y., Uchiumi, T., Arai, R., ... & Ohkawa, K. (2016). Characterization of silk gland ribosomes from a bivoltine caddisfly, Stenopsyche marmorata: translational suppression of a silk protein in cold conditions. Biochemical and biophysical research communications, 469(2), 210-215.
Arthropoda	Stenopsyche tienmushanensis	Stenopsyche	Caddisfly larvae	Aquatic bioadhesive	Permanent	Feeding, building shelter		Genomics + Long-read approaches	Luo et al. 2018	Luo, S., Tang, M., Frandsen, P. B., Stewart, R. J., & Zhou, X. (2018). The genome of an underwater architect, the caddisfly Stenopsyche tienmushanensis Hwang (Insecta: Trichoptera). GigaScience, 7(12), giy143.
Arthropoda	Brachycentrus echo		Caddisfly larvae	Aquatic bioadhesive	Permanent	Building (shelter)	Medium	Proteome	Stewart and Wang 2010	Stewart, R. J., & Wang, C. S. (2010). Adaptation of caddisfly larval silks to aquatic habitats by phosphorylation of H-fibroin serines. Biomacromolecules, 11(4), 969-974.
Arthropoda	Dosima fascicularis	Dosima	Barnacle	Aquatic bioadhesive	Permanent	Maintenance of position	Medium	Proteome	Zheden et al. 2014	Zheden, V., Klepal, W., von Byern, J., Bogner, F. R., Thiel, K., Kowalik, T., & Grunwald, I. (2014). Biochemical analyses of the cement float of the goose barnacle Dosima fascicularis–a preliminary study. Biofouling, 30(8), 949-963.
Arthropoda	Parapsyche elsis	Parapsyche	Caddisfly larvae	Aquatic bioadhesive	Permanent	Feeding, building shelter		Proteome + Long-read approaches	Frandsen et al. 2019	Frandsen, P. B., Bursell, M. G., Taylor, A. M., Wilson, S. B., Steeneck, A., & Stewart, R. J. (2019). Exploring the underwater silken architectures of caddisworms: comparative silkomics across two caddisfly suborders. Philosophical Transactions of the Royal Society B, 374(1784), 20190206.
Brachiopoda	Various species			Aquatic bioadhesive	Permanent	Maintenance of position	Low	Observations	Ruppert et al. 2003	Ruppert, E. E., Fox, R., & Barnes, R. D. (2003). Invertebrate zoology: a functional evolutionary approach—seventh edition. Pacific Grove: Brooks/Cole.
Bryozoa	Various species			Aquatic bioadhesive	Permanent	Maintenance of position	Medium	Morphology	Soule and Soule 1977	Soule, D. F., & Soule, J. D. (1979). Bryozoa (Ectoprocta). Pollution ecology of estuarine invertebrates, 35-76.
Chaetognatha	Spadella cephaloptera		arrow worm	Aquatic bioadhesive	Temporary	Maintenance of position	Low	Observations	John 1933	John, C. C. (1933). Memoirs: Habits, Structure, and Development of Spadella cephaloptera. Journal of Cell Science, 2(300), 625-696.
Arthropoda	Various species		Bolas spiders	Terrestrial bioadhesive	/	Feeding	Low	/	Betz and Kölsch 2004	Betz, O., & Kölsch, G. (2004). The role of adhesion in prey capture and predator defence in arthropods. Arthropod Structure & Development, 33(1), 3-30.
Arthropoda	Various species		Spitting spiders	Terrestrial bioadhesive	/	Feeding	Low	/	Betz and Kölsch 2005	Betz, O., & Kölsch, G. (2004). The role of adhesion in prey capture and predator defence in arthropods. Arthropod Structure & Development, 33(1), 3-30.
Arthropoda	Various species		Chilopoda (centipedes)	Terrestrial bioadhesive	/	Defense		/	von Byern et al. 2017	von Byern, J., Müller, C., Voigtländer, K., Dorrer, V., Marchetti-Deschmann, M., Flammang, P., & Mayer, G. (2017). Examples of bioadhesives for defence and predation. In Functional Surfaces in Biology III (pp. 141-191). Springer, Cham.
Arthropoda	Various species		ticks	Terrestrial bioadhesive	/	Maintenance of position, Feeding	High	/	Suppan et al. 2018	Suppan, J., Engel, B., Marchetti‐Deschmann, M., & Nürnberger, S. (2018). Tick attachment cement–reviewing the mysteries of a biological skin plug system. Biological Reviews, 93(2), 1056-1076.
Arthropoda	Arachnocampa luminosa		Glow worm	Terrestrial bioadhesive	/	Feeding	Medium	/	von Byern et al. 2019	von Byern, J., Chandler, P., Merritt, D., Adlassnig, W., Stringer, I., Meyer-Rochow, V. B., ... & Gorb, S. (2019). Biomechanical properties of fishing lines of the glowworm Arachnocampa luminosa (Diptera; Keroplatidae). Scientific reports, 9(1), 1-14.
Cnidaria	Hydra magnipapillata	Hydra	freshwater polyp	Aquatic bioadhesive	Temporary	Maintenance of position	High	Transcriptome + Proteome + In situ Hybridization	Rodrigues et al. 2016	Rodrigues, M., Ostermann, T., Kremeser, L., Lindner, H., Beisel, C., Berezikov, E., ... & Ladurner, P. (2016). Profiling of adhesive-related genes in the freshwater cnidarian Hydra magnipapillata by transcriptomics and proteomics. Biofouling, 32(9), 1115-1129.
Cnidaria	Cladonema radiatum; Eleutheria dichotoma; Vallentinia gabriella; Gonionemus vertens		hydrozoan medusae	Aquatic bioadhesive	Temporary	Maintenance of position	Medium	Morphology	Bouillon 1968; Singla 1977; Honegger 1984	Bouillon, J. (1968). Sur la structure des tentacules adhésifs des Cladonematidae et Eleutheriidae (Anthomedusae). Pubbl. Staz. zool. Napoli, 36, 471-504. Singla, C. L. (1977). Fine structure of the adhesive pads of Gonionemus vertens. Cell and tissue research, 181(3), 395-402. Honegger, T. G. (1984). Ultrastructure of the adhesive tentacles of the limnomedusa Vallentinia gabriella (Hydrozoa, Olin…
Cnidaria	Acropora millepora	Acropora		Aquatic bioadhesive	Permanent	Attachment	Low	qPCR/ microarray + Transcriptome	Moya et al. 2012	Moya, A., Huisman, L., Ball, E. E., Hayward, D. C., Grasso, L. C., Chua, C. M., ... & Miller, D. J. (2012). Whole transcriptome analysis of the coral Acropora millepora reveals complex responses to CO2‐driven acidification during the initiation of calcification. Molecular ecology, 21(10), 2440-2454.
Cnidaria	Exaiptasia pallida	Exaiptasia	Sea anemone	Aquatic bioadhesive	Transitory	Maintenance of position	Medium	Transcriptome	Davey et al. 2019	Davey, P. A., Rodrigues, M., Clarke, J. L., & Aldred, N. (2019). Transcriptional characterisation of the Exaiptasia pallida pedal disc. BMC genomics, 20(1), 1-15.
Cnidaria	Haliplanella luciae	Haliplanella	Sea anemone	Aquatic bioadhesive	Transitory	Maintenance of position	Medium	Transcriptome + Proteome	Wang et al. 2020	Wang, L., Teng, L., Zhang, X., Liu, X., Lyu, Q., Yang, Y., & Liu, W. (2020). Discovery and characterization of tyrosinases from sea anemone pedal disc. Journal of Adhesion Science and Technology, 34(17), 1840-1852.
Craniata	Gasterosteus aculeatus		three-spined stickleback (fish)	Aquatic bioadhesive	Permanent (?	Building (nest)	High	Genomics + Edman peptide sequencing + RT-PCR	Jones et al. 2001	Jones, I., Lindberg, C., Jakobsson, S., Hellqvist, A., Hellman, U., Borg, B., & Olsson, P. E. (2001). Molecular cloning and characterization of spiggin: An androgen-regulated extraorganismal adhesive with structural similarities to von Willebrand factor-related proteins. Journal of Biological Chemistry, 276(21), 17857-17863.
Ctenophora	Various species		comb jelly	Aquatic bioadhesive	Instantaneous	Feeding	Medium	Morphology	Ruppert et al. 2003	Ruppert, E. E., Fox, R., & Barnes, R. D. (2003). Invertebrate zoology: a functional evolutionary approach—seventh edition. Pacific Grove: Brooks/Cole.
Cycliophora	Various species			Aquatic bioadhesive	Permanent	Maintenance of position	Low	Observations	Kristensen 2002	Kristensen, R. M. (2002). An introduction to loricifera, cycliophora, and micrognathozoa. Integrative and Comparative Biology, 42(3), 641-651.
Echinodermata	Asterias rubens	Asterias	Sea star	Aquatic bioadhesive	Temporary	Maintenance of position, Locomotion	High	Transcriptome + Proteome	Hennebert et al. 2014	Hennebert, E., Wattiez, R., Demeuldre, M., Ladurner, P., Hwang, D. S., Waite, J. H., & Flammang, P. (2014). Sea star tenacity mediated by a protein that fragments, then aggregates. Proceedings of the National Academy of Sciences, 111(17), 6317-6322.
Echinodermata	Various species		Sea star	Aquatic bioadhesive	Temporary	Maintenance of position, Locomotion	Medium	Transcriptome + In situ Hybridization	Lengerer et al. 2019	Lengerer, B., Algrain, M., Lefevre, M., Delroisse, J., Hennebert, E., & Flammang, P. (2019). Interspecies comparison of sea star adhesive proteins. Philosophical Transactions of the Royal Society B: Biological Sciences, 374, 20190195.
Echinodermata	Paracentrotus lividus	Paracentrotus	Sea urchin	Aquatic bioadhesive	Temporary	Maintenance of position	High	Transcriptome + Proteome + In situ Hybridization	Santos et al. 2013; Lebesgue et al. 2016; Pjeta et al. 2020	Santos, R., Barreto, Â., Franco, C., & Coelho, A. V. (2013). Mapping sea urchins tube feet proteome - A unique hydraulic mechano-sensory adhesive organ. Journal of Proteomics, 79, 100–113. Lebesgue, N., da Costa, G., Ribeiro, R. M., Ribeiro-Silva, C., Martins, G. G., Matranga, V., Scholten, A., Cordeiro, C., Heck, A. J. R., & Santos, R. (2016). Deciphering the molecular mechanisms underlying sea …
Echinodermata	Holothuria forskali		Sea cucumber	Aquatic bioadhesive	Instantaneous	Defense	Medium	Morphology + Biomechanics + Biochemistry	Flammang et al. 2002; De Moor et al. 2003;	Flammang, P., Ribesse, J., & Jangoux, M. (2002). Biomechanics of adhesion in sea cucumber Cuvierian tubules (Echinodermata, Holothuroidea). Integrative and Comparative Biology, 42(6), 1107-1115., DeMoor, S., Waite, H. J., Jangoux, M. J., & Flammang, P. J. (2003). Characterization of the adhesive from cuvierian tubules of the sea cucumber Holothuria forskali (Echinodermata, Holothuroidea). Marine …
Echinodermata	Various species		Sea cucumbers, brittle stars, feather stars	Aquatic bioadhesive	Temporary	Feeding	Medium	Morphology	Santos et al. 2009	Santos, R., Hennebert, E., Coelho, A. V., & Flammang, P. (2009). The echinoderm tube foot and its role in temporary underwater adhesion. In Functional surfaces in biology (pp. 9-41). Springer, Dordrecht.
Gastrotricha	Various species		gastrotrich	Aquatic bioadhesive	Temporary	Maintenance of position	Medium	Morphology	Tyler and Rieger 1980, Tyler et al. 1980	Tyler, S., & Rieger, G. E. (1980). Adhesive organs of the Gastrotricha. Zoomorphologie, 95(1), 1-15.
Micrognathozoa	Limnognathia maerski			Aquatic bioadhesive	Temporary	Maintenance of position	Low	Observations	Kristensen & Funch 2000	Møbjerg Kristensen, R., & Funch, P. (2000). Micrognathozoa: a new class with complicated jaws like those of Rotifera and Gnathostomulida. Journal of morphology, 246(1), 1-49.
Mollusca	Dreissena polymorpha	Dreissena	Mussel	Aquatic bioadhesive	Permanent	Maintenance of position	High	qPCR/ microarray + Proteome	Xu & Faisal 2010; Gantayet et al. 2013	Xu, W., & Faisal, M. (2010). Gene expression profiling during the byssogenesis of zebra mussel (Dreissena polymorpha). Molecular Genetics and Genomics, 283(4), 327-339., Gantayet, A., Ohana, L., & Sone, E. D. (2013). Byssal proteins of the freshwater zebra mussel, Dreissena polymorpha. Biofouling, 29(1), 77-85.
Craniata	Notaden bennettii		Amphibia (frog)	Terrestrial bioadhesive	/	Defense	High	/	Graham et al. 2005; Graham et al. 2013	Graham, L. D., Glattauer, V., Huson, M. G., Maxwell, J. M., Knott, R. B., White, J. W., ... & Ramshaw, J. A. (2005). Characterization of a protein-based adhesive elastomer secreted by the Australian frog Notaden bennetti. Biomacromolecules, 6(6), 3300-3312., Graham, L. D., Glattauer, V., Li, D., Tyler, M. J., & Ramshaw, J. A. (2013). The adhesive skin exudate of Notaden bennetti frogs (Anura: Lim…
Craniata	Plethodon shermani		Amphibia (salamander)	Terrestrial bioadhesive	/	Defense	Medium	/	von Byern et al. 2017b	von Byern, J., Müller, C., Voigtländer, K., Dorrer, V., Marchetti-Deschmann, M., Flammang, P., & Mayer, G. (2017). Examples of bioadhesives for defence and predation. In Functional Surfaces in Biology III (pp. 141-191). Springer, Cham.
Mollusca	Dreissena bugensis	Dreissena	Mussel	Aquatic bioadhesive	Permanent	Maintenance of position	High	Transcriptome + Proteome	Rees et al. 2019	Rees, D. J., Hanifi, A., Obille, A., Alexander, R., & Sone, E. D. (2019). Fingerprinting of proteins that mediate Quagga mussel adhesion using a De Novo assembled foot transcriptome. Scientific reports, 9(1), 1-14.
Mollusca	Perna viridis	Perna	Mussel	Aquatic bioadhesive	Permanent	Maintenance of position	High	Transcriptome + Proteome	Guerette et al. 2013; Zhang et al. 2017	Guerette, P. A., Hoon, S., Seow, Y., Raida, M., Masic, A., Wong, F. T., ... & Miserez, A. (2013). Accelerating the design of biomimetic materials by integrating RNA-seq with proteomics and materials science. Nature biotechnology, 31(10), 908-915., Zhang, X., Ruan, Z., You, X., Wang, J., Chen, J., Peng, C., & Shi, Q. (2017). De novo assembly and comparative transcriptome analysis of the foot from …
Mollusca	Perna cochlidium	Perna	Mussel	Aquatic bioadhesive	Permanent	Maintenance of position	Medium	Transcriptome + Proteome	Guerette et al. 2013	Guerette, P. A., Hoon, S., Seow, Y., Raida, M., Masic, A., Wong, F. T., ... & Miserez, A. (2013). Accelerating the design of biomimetic materials by integrating RNA-seq with proteomics and materials science. Nature biotechnology, 31(10), 908-915.
Mollusca	Limnoperna fortunei	Limnoperna	Mussel	Aquatic bioadhesive	Permanent	Maintenance of position	High	Transcriptome + Proteome + qPCR/microarray	Uliano-Silva et al. 2014; Li et al. 2018	Uliano-Silva, M., Americo, J. A., Brindeiro, R., Dondero, F., Prosdocimi, F., & de Freitas Rebelo, M. (2014). Gene discovery through transcriptome sequencing for the invasive mussel Limnoperna fortunei. PLoS One, 9(7), e102973., Li, S., Xia, Z., Chen, Y., Gao, Y., & Zhan, A. (2018). Byssus structure and protein composition in the highly invasive fouling mussel Limnoperna fortunei. Frontiers in ph…
Mollusca	Chlamys farreri	Chlamys	Scallop	Aquatic bioadhesive	Permanent	Maintenance of position	High	Genome + Transcriptome + Proteome	Miao et al. 2015; Li et al. 2017	Miao, Y., Zhang, L., Sun, Y., Jiao, W., Li, Y., Sun, J., ... & Liu, W. (2015). Integration of transcriptomic and proteomic approaches provides a core set of genes for understanding of scallop attachment. Marine biotechnology, 17(5), 523-532.
Mollusca	Mytilus coruscus	Mytilus	Mussel	Aquatic bioadhesive	Permanent	Maintenance of position	High	Transcriptome + Proteome	Qin et al. 2016	Qin, C. L., Pan, Q. D., Qi, Q., Fan, M. H., Sun, J. J., Li, N. N., & Liao, Z. (2016). In-depth proteomic analysis of the byssus from marine mussel Mytilus coruscus. Journal of proteomics, 144, 87-98.
Mollusca	Mytilus californianus	Mytilus	Mussel	Aquatic bioadhesive	Permanent	Maintenance of position	High	Transcriptome + Proteome	DeMartini et al. 2017	DeMartini, D. G., Errico, J. M., Sjoestroem, S., Fenster, A., & Waite, J. H. (2017). A cohort of new adhesive proteins identified from transcriptomic analysis of mussel foot glands. Journal of The Royal Society Interface, 14(131), 20170151.
Mollusca	Pinctada fucata	Pinctada	Oyster	Aquatic bioadhesive	Permanent	Maintenance of position	High	Transcriptome + Proteome	Li et al. 2017	Li, S., Liu, C., Zhan, A., Xie, L., & Zhang, R. (2017). Influencing mechanism of ocean acidification on byssus performance in the pearl oyster Pinctada fucata. Environmental science & technology, 51(13), 7696-7706.
Mollusca	Crassostrea gigas	Crassostrea	Oyster	Aquatic bioadhesive	Permanent	Maintenance of position	Medium	Proteome + In situ Hybridization	Foulon et al. 2018	Foulon, V., Artigaud, S., Buscaglia, M., Bernay, B., Fabioux, C., Petton, B., ... & Boudry, P. (2018). Proteinaceous secretion of bioadhesive produced during crawling and settlement of Crassostrea gigas larvae. Scientific reports, 8(1), 1-14.
Mollusca	Patella vulgata	Patella	Limpet	Aquatic bioadhesive	Transitory	Maintenance of position, Locomotion	High	Transcriptome + Proteome + In situ Hybridization	Kang et al. 2020	Kang, V., Lengerer, B., Wattiez, R., & Flammang, P. (2020). Molecular insights into the powerful mucus-based adhesion of limpets (Patella vulgata L.). Open biology, 10(6), 200019.
Mollusca	Ischnochiton hakodadensis	Ischnochiton	Chiton	Aquatic bioadhesive	Transitory	Maintenance of position, Locomotion	Medium	Transcriptome	Dou et al. 2018	Dou, H., Miao, Y., Li, Y., Li, Y., Dai, X., Zhang, X., ... & Bao, Z. (2018). Characterization of chiton Ischnochiton hakodadensis foot based on transcriptome sequencing. Journal of Ocean University of China, 17(3), 632-640.
Mollusca	Various species		Scaphopod	Aquatic bioadhesive	Temporary	Feeding	Medium	Morphology	Shimek 1988; Byrum and Ruppert 1994	SHIMEK, R. L. (1988). The functional morphology of scaphopod captacula. The Veliger, 30(3), 213-221., Byrum, C. A., & Ruppert, E. E. (1994). The ultrastructure and functional morphology of a captaculum in Graptacme calamus (Mollusca, Scaphopoda). Acta Zoologica, 75(1), 37-46.
Mollusca	Sepia tuberculata		Cuttlefish	Aquatic bioadhesive	Temporary	Maintenance of position	Medium	Morphology + Histochemistry	von Byern et al. 2011	von Byern, J., Scott, R., Griffiths, C., Micossi, A., Grunwald, I., & Cyran, N. (2011). Characterization of the adhesive areas in Sepia tuberculata (Mollusca, Cephalopoda). Journal of morphology, 272(10), 1245-1258.
Mollusca	Euprymna scolopes		Squid	Aquatic bioadhesive	Temporary	Defense	Medium	Morphology + Histochemistry	von Byern et al. 2017	von Byern, J., Cyran, N., Klepal, W., Nödl, M. T., & Klinger, L. (2017). Characterization of the adhesive dermal secretion of Euprymna scolopes Berry, 1913 (Cephalopoda). Zoology, 120, 73-82.
Mollusca	Idiosepius spp		Squid	Aquatic bioadhesive	Temporary	Maintenance of position	Medium	Morphology + Histochemistry	von Byern et al. 2008	Von Byern, J., Rudoll, L., Cyran, N., & Klepal, W. (2008). Histochemical characterization of the adhesive organ of three Idiosepius spp. species. Biotechnic & Histochemistry, 83(1), 29-46.
Mollusca	Nautilus pompilius		Nautilus	Aquatic bioadhesive	Temporary	Feeding	Medium	Morphology + Histochemistry	von Byern et al. 2012	von Byern, J., Wani, R., Schwaha, T., Grunwald, I., & Cyran, N. (2012). Old and sticky—adhesive mechanisms in the living fossil Nautilus pompilius (Mollusca, Cephalopoda). Zoology, 115(1), 1-11.
Nematoda	Theristus caudasaliens		roundworm	Aquatic bioadhesive	Temporary	Maintenance of position	Medium	Morphology	Adams and Tyler 1980	Adams, P. J., & Tyler, S. (1980). Hopping locomotion in a nematode: Functional anatomy of the caudal gland apparatus of Theristus caudasaliens sp. n. Journal of Morphology, 164(3), 265-285.
Placozoa	Trichoplax adhaerens			Aquatic bioadhesive	Transitory	Maintenance of position, Locomotion	Medium	Morphology	Mayorova et al. 2019	Mayorova, T. D., Hammar, K., Winters, C. A., Reese, T. S., & Smith, C. L. (2019). The ventral epithelium of Trichoplax adhaerens deploys in distinct patterns cells that secrete digestive enzymes, mucus or diverse neuropeptides. Biology open, 8(8).
Platyhelminthes	Macrostomum lignano, M. poznaniense		Flatworm	Aquatic bioadhesive	Temporary	Maintenance of position	High	Transcriptome + in situ hybridisation + RNAi + long-sequence reads	Wunderer et al. 2019, Davey et al. 2021	Wunderer, J., Lengerer, B., Pjeta, R., Bertemes, P., Kremser, L., Lindner, H., ... & Ladurner, P. (2019). A mechanism for temporary bioadhesion. Proceedings of the National Academy of Sciences, 116(10), 4297-4306. Davey, P. A., Power, A. M., Santos, R., Bertemes, P., Ladurner, P., Palmowski, P., ... & Aldred, N. (2021). Omics‐based molecular analyses of adhesion by aquatic invertebrates. Biologic…
Platyhelminthes	Minona ileanae		Flatworm	Aquatic bioadhesive	Temporary	Maintenance of position	High	Transcriptome + in situ hybridisation + RNAi + long-sequence reads	Pjeta et al. 2019	Pjeta, R., Wunderer, J., Bertemes, P., Hofer, T., Salvenmoser, W., Lengerer, B., ... & Ladurner, P. (2019). Temporary adhesion of the proseriate flatworm Minona ileanae. Philosophical Transactions of the Royal Society B, 374(1784), 20190194.
Platyhelminthes	Entobdella soleae and other species		Monogenean	Aquatic bioadhesive	Temporary	Maintenance of position	Medium	Morphology + Biochemistry	Kearn and Evans-Gowing 1998	Kearn, G. C., & Evans-Gowing, R. (1998). Attachment and detachment of the anterior adhesive pads of the monogenean (platyhelminth) parasite Entobdella soleae from the skin of the common sole (Solea solea). International journal for parasitology, 28(10), 1583-1593.
Platyhelminthes	Various species			Aquatic bioadhesive	Transitory	Locomotion	Medium	Morphology	Martin 1978b	Martin, G. G. (1978). A new function of rhabdites: mucus production for ciliary gliding. Zoomorphologie, 91(3), 235-248.
Porifera	various species		Sponges	Aquatic bioadhesive	Permanent	Maintenance of position	Low	Morphology	Harrison and De Vos 1991	Harrison, F. W., & De Vos, L. (1991). Porifera. In ‘Microscopic Anatomy of Invertebrates’.(Ed FW Harrison) pp. 29–89.
Rotifera	Philodina roseola		Rotifer	Aquatic bioadhesive	Temporary	Maintenance of position	Medium	Morphology	Ruppert et al. 2003	Ruppert, E. E., Fox, R., & Barnes, R. D. (2003). Invertebrate zoology: a functional evolutionary approach—seventh edition. Pacific Grove: Brooks/Cole.
Tunicata	Ciona robusta	Ciona	Ascidian	Aquatic bioadhesive	Permanent	Maintenance of position	Medium	Genome + Proteome	Li et al. 2019	Li, S., Huang, X., Chen, Y., Li, X., & Zhan, A. (2019). Identification and characterization of proteins involved in stolon adhesion in the highly invasive fouling ascidian Ciona robusta. Biochemical and biophysical research communications, 510(1), 91-96.
Tunicata	Various species		Ascidian	Aquatic bioadhesive	Transitory	Feeding	Medium	Morphology	Ruppert et al. 2003	Ruppert, E. E., Fox, R., & Barnes, R. D. (2003). Invertebrate zoology: a functional evolutionary approach—seventh edition. Pacific Grove: Brooks/Cole.
Phoronida	Various species		Horseshoe worms	Aquatic bioadhesive	Transitory	Feeding	Low	Observations	Ruppert et al. 2003	Ruppert, E. E., Fox, R., & Barnes, R. D. (2003). Invertebrate zoology: a functional evolutionary approach—seventh edition. Pacific Grove: Brooks/Cole.
Entoprocta	Various species			Aquatic bioadhesive	Permanent	Maintenance of position	Low	Observations	Ruppert et al. 2003	Ruppert, E. E., Fox, R., & Barnes, R. D. (2003). Invertebrate zoology: a functional evolutionary approach—seventh edition. Pacific Grove: Brooks/Cole.
Cephalochordata	Various species			Aquatic bioadhesive	Transitory	Feeding	Low	Observations	Ruppert et al. 2003	Ruppert, E. E., Fox, R., & Barnes, R. D. (2003). Invertebrate zoology: a functional evolutionary approach—seventh edition. Pacific Grove: Brooks/Cole.
Mollusca	Arion subfuscus		Slug	Terrestrial bioadhesive	/	Defense	High	Transcriptome + Proteome	Smith et al. 2017	Andrew M. Smith, Cassandra Papaleo, Christopher W. Reid & Joseph M. Bliss (2017) RNA-Seq reveals a central role for lectin, C1q and von Willebrand factor A domains in the defensive glue of a terrestrial slug, Biofouling, 33:9, 741-754, DOI: 10.1080/08927014.2017.1361413
Mollusca	Various species		Pulmonate gastropods (snails and slugs)	Terrestrial bioadhesive	/	Locomotion	Medium	/	Denny 1980	Denny, M. (1980). The role of gastropod pedal mucus in locomotion. Nature, 285(5761), 160-161.
Hemichordata	Various species		Acorn worms (Enteropneusta)	Aquatic bioadhesive	Transitory	Feeding	Low	Observations	Ruppert et al. 2003	Ruppert, E. E., Fox, R., & Barnes, R. D. (2003). Invertebrate zoology: a functional evolutionary approach—seventh edition. Pacific Grove: Brooks/Cole.
Onychophora	Various species		Velvet worms	Terrestrial bioadhesive	/	Feeding, Defense	High	/	Baer et al. 2019	Baer, A., & Mayer, G. (2012). Comparative anatomy of slime glands in Onychophora (velvet worms). Journal of morphology, 273(10), 1079-1088.
Nemertea	Various species			Aquatic bioadhesive	Transitory	Locomotion	Low	Morphology	Martin 1978b, Ruppert et al. 2003	Martin, G. G. (1978). A new function of rhabdites: mucus production for ciliary gliding. Zoomorphologie, 91(3), 235-248., Ruppert, E. E., Fox, R., & Barnes, R. D. (2003). Invertebrate zoology: a functional evolutionary approach—seventh edition. Pacific Grove: Brooks/Cole.
Xenacoelomorpha	Various species			Aquatic bioadhesive	Transitory	Locomotion	Medium	Morphology	Jondelius et al. 2019	Jondelius, U., Raikova, O. I., & Martinez, P. (2019). Xenacoelomorpha, a key group to understand bilaterian evolution: Morphological and molecular perspectives. In Evolution, Origin of Life, Concepts and Methods (pp. 287-315). Springer, Cham.
Annelida	Placobdella parasitica, Hirudo verbana		Leech	Suction	Temporary	Maintenance of position, locomotion	High	Morphology & pressure measurements	Gradwell 1972; Kampowski et al. 2016	Gradwell, N. (1972). Behaviors of the leech, Placobdella, and transducer recordings of suctorial pressures. Canadian Journal of Zoology, 50(10), 1325-1332. Kampowski, T., Eberhard, L., Gallenmüller, F., Speck, T., & Poppinga, S. (2016). Functional morphology of suction discs and attachment performance of the Mediterranean medicinal leech (Hirudo verbana Carena). Journal of The Royal Society Inter…
Arthropoda	Dytiscidae family		Diving beetles	Suction	Temporary	Maintenance of position	Medium	Morphology (no piston muscles); performance (reduced on rough surfaces)	Aiken & Khan 1992; Karlsson Green et al. 2013; Chen et al. 2014	Aiken, R. B., & Khan, A. (1992). The adhesive strength of the palettes of males of a boreal water beetle, Dytiscus alaskanus J. Balfour Browne (Coleoptera: Dytiscidae). Canadian Journal of Zoology, 70(7), 1321-1324. Karlsson Green, K., Kovalev, A., Svensson, E. I., & Gorb, S. N. (2013). Male clasping ability, female polymorphism and sexual conflict: fine-scale elytral morphology as a sexually ant…
Craniata	Cyclopteridae family (e.g., Eumicrotremus orbis, Cyclopterus lumpus)		Lumpsuckers	Suction	Temporary	Maintenance of position	High	Morphology (muscles & structures for active pressure generation)	Arita 1967; Davenport & Thorsteinsson 1990	Arita, G. S. (1967). A comparative study of the structure and function of the adhesive apparatus of the Cyclopteridae and Gobiesocidae (Doctoral dissertation, University of British Columbia).
Craniata	Gobiesocidae family		Clingfish	Suction	Temporary	Maintenance of position	High	Morphology & force measurements	Arita 1967; Ditsche et al. 2014; Wainwright et al. 2013; Ditsche & Summers 2019	Arita, G. S. (1967). A comparative study of the structure and function of the adhesive apparatus of the Cyclopteridae and Gobiesocidae (Doctoral dissertation, University of British Columbia). Ditsche, P., Wainwright, D. K., & Summers, A. P. (2014). Attachment to challenging substrates - fouling, roughness and limits of adhesion in the northern clingfish (Gobiesox maeandricus). Journal of Experime…
Craniata	Liparidae family		Snailfish	Suction	Temporary	Maintenance of position	Medium	Morphology	Budney & Hall 2010	Budney, L. A., & Hall, B. K. (2010). Comparative morphology and osteology of pelvic fin-derived midline suckers in lumpfishes, snailfishes and gobies. Journal of Applied Ichthyology, 26(2), 167–175.
Craniata	Gobiidae family		True gobies	Suction	Temporary	Maintenance of position; locomotion	High	Morphology & force measurements	Schoenfuss & Blob, 2003; Maie et al. 2012; Palecek et al 2020	Schoenfuss, H. L., & Blob, R. W. (2003). Kinematics of waterfall climbing in Hawaiian freshwater fishes (Gobiidae): vertical propulsion at the aquatic–terrestrial interface. Journal of Zoology, 261, 191–205. Maie, T., Schoenfuss, H. L., & Blob, R. W. (2012). Performance and scaling of a novel locomotor structure: adhesive capacity of climbing gobiid fishes. Journal of Experimental Biology, 215, 3…
Craniata	Various anurans (including several species in Bufonidae, Ranidae, and Hylidae families)		Gastromyzophorous tadpoles	Suction	Temporary	Maintenance of position	High	Morphology & pressure measurements	Gradwell 1971; Gradwell 1975	Gradwell, N. (1971). Ascaphus tadpole: experiments on the suction and gill irrigation mechanisms. Canadian Journal of Zoology, 49, 307–332. Gradwell, N. (1975). Experiments on oral suction and gill breathing in five species of Australian tadpole (Anura: Hylidae and Leptodactylidae). Journal of Zoology, 177(1), 81–98.
Mollusca	Various Octopus species		Octopus	Suction	Temporary	Maintenance of position, locomotion, feeding, defense	High	Based on morphology & pressure measurements	Smith 1991, 1996	Smith, A. M. (1991). Negative Pressure Generated By Octopus Suckers: a Study of the Tensile Strength of Water in Nature. Journal of Experimental Biology, 157, 257–271. Smith, A. M. (1996). Cephalopod sucker design and the physical limits to negative pressure. The Journal of Experimental Biology, 199, 949–958.
Mollusca	Lottia species		Lottid limpets	Suction	Transitory	Maintenance of position, locomotion	High	Based on pressure measurements	Smith 1991, 1996	Smith, A. M. (1991). Negative Pressure Generated By Octopus Suckers: a Study of the Tensile Strength of Water in Nature. Journal of Experimental Biology, 157, 257–271. Smith, A. M. (1996). Cephalopod sucker design and the physical limits to negative pressure. The Journal of Experimental Biology, 199, 949–958.
Arthropoda	Blephariceridae family (e.g., Liponeura cinerascens, Hapalothrix lugubris)		Net-winged midge (larvae)	Suction	Temporary	Maintenance of position, locomotion	High	Morphology (piston muscles)	Komárek 1914; Frutiger 2002; Kang et al. 2019	Komárek, J. (1914). Die Morphologie und Physiologie der Haftscheiben der Blepharoceridenlarven. Sitzungsberichte der Königlich Böhmischen Gesellschaft der Wissenschaften II Cl, 1-28. Frutiger, A. (2002). The function of the suckers of larval net‐winged midges (Diptera: Blephariceridae). Freshwater Biology, 47(2), 293-302. Kang, V., Johnston, R., van de Kamp, T., Faragó, T., & Federle, W. (2019). …
Craniata	Petromyzontidae family		Lampreys	Suction*	Temporary	Maintenance of position, feeding	High	Morphology & pressure measurements	Gradwell 1972	Gradwell, N. (1972). Hydrostatic pressures and movements of the lamprey, Petromyzon, during suction, olfaction, and gill ventilation. Canadian Journal of Zoology, 50, 1215–1223.
Craniata	Echeneis species		Remora fish	Suction	Temporary	Maintenance of position	High	Morphology & pressure measurements	Fulcher & Motta 2006	Fulcher, B. A., & Motta, P. J. (2006). Suction disk performance of echeneid fishes. Canadian Journal of Zoology, 84(1), 42–50.
Mollusca	Various species		Squid	Suction*	Temporary	Feeding	High	Based on morphology & pressure measurements	Smith 1996, Hou et al. 2012	Smith, A. M. (1996). Cephalopod sucker design and the physical limits to negative pressure. The Journal of Experimental Biology, 199, 949–958. Hou, J., Wright, E., Bonser, R. H. C., & Jeronimidis, G. (2012). Development of Biomimetic Squid-Inspired Suckers. Journal of Bionic Engineering, 9(4), 484–493.
Platyhelminthes	Various species		Tapeworms	Suction*	Temporary	Maintenance of position	Low	Morphology	Chambrier & Scholz 2008; Twohig et al. 2008; Cousin et al. 1995;	Scholz, T., Chambrier, A., & Kuchta, R. (2008). Redescription of the tapeworm Monticellia amazonica de Chambrier et Vaucher, 1997 (Cestoda, Proteocephalidea), a parasite of Calophysus macropterus (Siluriformes, Pimelodidae) from the Amazon River. Acta Parasitologica, 53(1), 30-35. Twohig, M. E., Caira, J. N., & Fyler, C. A. (2008). Two new cestode species from the dwarf whipray, Himantura walga (…
Note: *also uses piercing structures

## Sheet: Table2
	Amino acid composition (mol%)
	Gly	Ala	Val	Leu	Ile	Ser	Thr	Asx	Glx	Lys	Arg	His	Phe	Tyr	DOPA	Pro	Met	Cys/2
Pc (tube worm)	24	6.5	4.4	3.3	1.1	29	0	2	0.9	11.8	4	2.8	1.6	3.3	2.6	2.4	0.3	0
Me (mussel)	23.3	7.9	3.6	4.2	2.2	6.6	2.8	10.5	4.1	4.1	5.9	3.1	3.7	8.1	0.9	5.1	0.4	1
Be (barnacle)	6.6	4.9	6.2	11	6.9	8.3	5.7	5.7	6.4	5.3	7.5	2.3	5.3	7.5	0	8.6	1.1	0.6
Mr (barnacle)	7.9	7.5	7.3	8.3	5.3	9.9	7.1	9.1	9.2	5.7	5.6	1.3	3.7	4.2	0	4.9	1.6	1.6
Pv (limpet)	7.1	6.5	5.5	6.3	4.2	6.8	7.6	9.4	9.7	2.7	3.8	1.3	3	2.2	0	5.7	0.4	0.9
Ll (limpet)	8	5.2	7.2	5.1	5.2	9	11.6	12.7	11.5	5.9	3.3	1	2.6	1.8	0	7.9	1.1	2
Es (flatworm)	11.7	6.4	10.2	6.1	4	7.5	5.3	9.8	14.4	7.3	4.3	1.6	2.6	2.7	0	4.5	1.7	0
Ar (sea star, tube feet)	9.7	6.2	6.7	6.1	4.5	7.6	7.8	11.8	10.2	5.6	4.1	2.1	3.8	2.7	0	6.1	1.7	3.2
Bc (barnacle)	8.6	6.5	2.2	8.1	5.3	7.7	6.2	8.3	8.6	6.8	6.1	2.2	4	5.4	0	6.1	0.7	7.3
Bh (barnacle)	8	6.6	2.6	8.4	4.3	10.9	6.3	7.5	8.7	5.3	5.6	2.2	3.5	4.7	0	8.1	0.7	6.6
Hf (sea cucumber, C. tubules)	26.6	8.8	3.8	3.7	2.8	6	8.7	7.8	9.1	3.1	5	2.6	2	2	0	5.5	1	1.4
Gd (mussel)	18.6	5.4	5.7	5.5	3.6	7.4	4.2	11	8.2	6.4	4.5	1.6	4.9	3.7	1.8	5.1	0.8	0.7
Hl (sea cucumber, C. tubules)	26.7	11.5	2.9	3.1	2.4	4.2	6.9	7.4	12.2	1.7	5.7	1.3	1.6	1.4	0	7.4	0.9	0.3
Bs (sea cucumber, C. tubules)	29.8	9.1	3.5	3.7	2.5	5.8	6.5	6.4	10.6	4.1	4.6	0.8	2	1.7	0	6.9	0.1	0.9
Pg (sea cucumber, C. tubules)	25.4	8.5	3.7	3.8	3.2	5.8	8	6.2	12.4	2.5	6.3	2	2	1.7	0	6.3	0.9	0.4
Pl (sea urchin, tube feet)	14.7	9.8	8.9	7.2	5	8.6	7.4	4.8	7.4	2.7	4	1.3	3.1	3.8	0	6.8	1.9	2.6
Nb (frog)	15.8	2.8	6.2	6.9	4.8	3.8	4.4	7.2	14.1	5.8	3.8	3.1	3.8	2.2	0	8.8	1.1	0.7
Ek (velvet worm)	27.3	3.5	5.2	4.5	5.1	4.2	3.6	5	5.1	6.9	3.9	2.2	2.8	3.8	0	13.1	1.4	0
Ga (fish)	7.8	4.5	6.2	6.2	4.8	7.6	7.7	10	9.3	6.3	4.5	3.7	3.7	3.4	0	4.9	1.4	8
UniProtKB/Swiss_Prot	7.1	8.3	6.9	9.7	6	6.6	5.3	4.1	3.9	5.8	5.5	2.3	3.9	2.9	0	4.7	2.4	1.4
Be (caddisfly)	20.1	6.3	4.1	6	3.8	15.4	3.2	11.7	3.5	4.2	8.8	0.7	1.2	4.1	0	4	0	0
Pm (Onychophora)	20.4	2.1	5.2	4.7	4.7	3.2	4.6	12.4	9.5	9.1	4.1	2.3	4.3	3.7	0	7.7	1.3	0.7
Ma (Monogeneans)	19.3	10.3	5.5	7.4	3.9	14.9	0.4	7	10.1	4.2	6.1	0.5	3.1	1.4	0	6.7	0	0
Mi (Monogeneans)	18.9	13.9	4.5	12.3	3.1	8.2	2.4	5.3	5.7	4.1	3.9	0	10.1	1.6	0	5.4	0.8	0
Ms (Monogeneans)	18.7	10.4	5.8	11.2	2.9	8.4	2.9	3.1	13	2.9	3.9	0	11.2	1.1	0	5.8	1.1	0
Mh (Monogeneans)	16.1	8	4.7	12.5	3.3	1	4.6	5.5	6.9	3.9	4.3	0.1	12.9	1.5	0	5.3	0.2	0
Tr (Monogeneans)	15.2	9.7	4.8	12.1	3.3	8	3.4	8.4	8.3	3.9	3.7	3	11.1	1.4	0	5.3	1.1	0
Nr (Monogeneans)	18.1	11.7	4.4	12.6	3.3	7.6	3.1	5.4	6.1	4.2	4.1	0	11.3	1.6	0	5.6	0.9	0
La (goose barnacle)	7.9	7.8	7.6	11.3	7.1	11	4.9	8.2	7.9	2.6	2.8	1.8	4	2.9	0	5.8	0.6	1.8
Dm (tick)	27.2	6.4	5.5	13	0.4	12.4	3.6	2.8	3.1	1	0.6	1.3	5.2	7.4	0	9.8	0	0
Hm (human, secreted proteins)	8.4	6.9	6	9.8	3.7	7.5	5.3	4.2	5.2	4.7	5.9	2.5	3.6	2.8	0	7.1	1.9	3.5
Df (goose barnacle)	8.7	9.9	7.8	9.8	6.8	9.9	6.4	10.1	11.4	2.5	6.1	0.5	4.9	0.1	0	4.4	0.6	0.2
Sf (tube worm)	30.8	8.6	2.7	2.7	1.3	20	2.6	6.1	3.8	3.7	3.7	1.5	3	3.1	0	5.2	0.7	0.5
Sk (tube worm)	22.4	8.5	4.6	4.4	2.9	14.9	5.6	9.5	8	3.3	5.6	1.4	2.2	0.8	0	4.6	0.8	0.5
Pl (tube worm)	27.1	7.7	3.7	5.5	2.1	19.3	3.5	7.1	5	2.6	4.7	1.9	2.2	4	0	2.5	0.8	0.3
Pm (tube worm)	24.9	8.3	6	5.8	2.4	22.5	7.8	7.8	4.8	3.3	2.8	0.9	1.6	0.1	0	3.3	0.6	0.8

## Sheet: Table3
Phylum	Species	Protein	GenBank Accession Number	Domains present	Citation	Level of confidence	Sequence completeness
Echinodermata	Paracentrotus lividus (sea urchin)	Nectin variant 1	AJ578435.2		Costa et al. 2010; doi: 10.1007/s11030-009-9203-3		Y
Echinodermata	Paracentrotus lividus	Nectin variant 2	KT351732.1		Toubarro et al. 2016; doi: 10.1007/s10126-016-9698-4		Y
Echinodermata	Paracentrotus lividus	Nectin variant 3; homology with Arub-27 Asterias rubens)	TR60905_c1_g1_i1_5		Pjeta et al. 2020	Transcriptomics + proteomics + ISH	Y
Echinodermata	Paracentrotus lividus	Homology with XP_030852014.1 alpha tectorin 1 [Strongylocentrotus purpuratus]; Sfp1 [Asterias rubens]	TR63383_c2_g1_i1_5 + TR46688_c0_g1_i1_6		Pjeta et al. 2020	Transcriptomics + proteomics + ISH	5' missing
Echinodermata	Paracentrotus lividus	Homology with XP_011676138.2 alpha-2-macroglobulin-like protein 1 [Strongylocentrotus purpuratus]; Arub-13 [Asterias rubens]	TR61622_c8_g1_i2_4		Pjeta et al. 2020	Transcriptomics + proteomics + ISH	5' missing
Echinodermata	Paracentrotus lividus	Homology with XP_787204.4 myeloperoxidase [Strongylocentrotus purpuratus]; Arub-30 [Asterias rubens]	TR57217_c2_g1_i1_5		Pjeta et al. 2020	Transcriptomics + proteomics + ISH	Y
Echinodermata	Paracentrotus lividus	Homology with XP_019629564.1 PREDICTED: SCO-spondin-like [Branchiostoma belcheri]; Arub-11 [Asterias rubens]	TR43200_c3_g1_i5_6		Pjeta et al. 2020	Transcriptomics + proteomics + ISH	Y
Echinodermata	Paracentrotus lividus	Homolgy with XP_030840935.1 Fibrillin-2 [Strongylocentrotus purpuratus]; Arub-1, 6, 20, 24 [Asterias rubens]	TR63654_c4_g1_i1_5		Pjeta et al. 2020	Transcriptomics + proteomics + ISH	5' missing
Echinodermata	Asterias rubens (sea star)	Sfp-1	AHN92641.1	FA58C, galactose binding domain, vWFD, EGF, C8	Hennebert et al. 2014; Lefevre et al. 2020	Transcriptomics + proteomics + antibody labelling + recombinant expression	Y
Echinodermata	Asterias rubens	Arub-1	GHKZ01075379		Lengerer et al. 2019	Transcriptomics + proteomics + ISH	Y
Echinodermata	Asterias rubens	Arub-2	GHKZ01074524		Lengerer et al. 2019	Transcriptomics + proteomics + ISH	N
Echinodermata	Asterias rubens	Arub-3	GHKZ01068220		Lengerer et al. 2019	Transcriptomics + proteomics + ISH	Y
Echinodermata	Asterias rubens	Arub-4	GHKZ01069933		Lengerer et al. 2019	Transcriptomics + proteomics + ISH	Y
Echinodermata	Asterias rubens	Arub-5	GHKZ01076463		Lengerer et al. 2019	Transcriptomics + proteomics + ISH	N
Echinodermata	Asterias rubens	Arub-6	GHKZ01073885		Lengerer et al. 2019	Transcriptomics + proteomics + ISH	Y
Echinodermata	Asterias rubens	Arub-7	GHKZ01092496		Lengerer et al. 2019	Transcriptomics + proteomics + ISH	N
Echinodermata	Asterias rubens	Arub-8	GHKZ01070994		Lengerer et al. 2019	Transcriptomics + proteomics + ISH	N
Echinodermata	Asterias rubens	Arub-9	GHKZ01076249		Lengerer et al. 2019	Transcriptomics + proteomics + ISH	N
Echinodermata	Asterias rubens	Arub-10	GHKZ01073336		Lengerer et al. 2019	Transcriptomics + proteomics + ISH	N
Echinodermata	Asterias rubens	Arub-11	GHKZ01040734		Lengerer et al. 2019	Transcriptomics + proteomics + ISH	N
Echinodermata	Asterias rubens	Arub-12	GHKZ01028140		Lengerer et al. 2019	Transcriptomics + proteomics + ISH	N
Echinodermata	Asterias rubens	Arub-13	GHKZ01072973		Lengerer et al. 2019	Transcriptomics + proteomics + ISH	Y
Echinodermata	Asterias rubens	Arub-14	GHKZ01036917		Lengerer et al. 2019	Transcriptomics + proteomics + ISH	N
Echinodermata	Asterias rubens	Arub-15	GHKZ01066201		Lengerer et al. 2019	Transcriptomics + proteomics + ISH	N
Echinodermata	Asterias rubens	Arub-16	GHKZ01076468		Lengerer et al. 2019	Transcriptomics + proteomics + ISH	N
Echinodermata	Asterias rubens	Arub-17	GHKZ01076234		Lengerer et al. 2019	Transcriptomics + proteomics + ISH	Y
Echinodermata	Asterias rubens	Arub-18	GHKZ01028139		Lengerer et al. 2019	Transcriptomics + proteomics + ISH	N
Echinodermata	Asterias rubens	Arub-19	GHKZ01073042		Lengerer et al. 2019	Transcriptomics + proteomics + ISH	N
Echinodermata	Asterias rubens	Arub-20	GHKZ01075375		Lengerer et al. 2019	Transcriptomics + proteomics + ISH	Y
Echinodermata	Asterias rubens	Arub-21	GHKZ01092493		Lengerer et al. 2019	Transcriptomics + proteomics + ISH	N
Platyhelminthes	Macrostomum lignano (flatworm)	Mlig-ap1	MH586844	C-type lectin-like, vWFD, C8, TIL, EGF, KR-rich region	Wunderer et al. 2019	Transcriptomics + ISH + RNAi knockout
Platyhelminthes	Macrostomum lignano	Mlig-ap2	MH586845	TIL, C8, vWFD, LDLrA, TSP-1, 255aa repeats	Wunderer et al. 2019	Transcriptomics + ISH + RNAi knockout
Platyhelminthes	Minona ileanae (flatworm)	Mile-ap1	MK854810	C-type lectin-like, vWFD, C8, TIL, EGF	Pjeta et al. 2019	Transcriptomics + ISH + RNAi knockout	Y
Platyhelminthes	Minona ileanae	Mile-ap2a	MK854811	Repeats	Pjeta et al. 2019	Transcriptomics + ISH + RNAi knockout	Missing stop codon
Platyhelminthes	Minona ileanae	Mile-ap3a	MK854813	GRK-rich region	Pjeta et al. 2019	Transcriptomics + ISH + RNAi knockout	Missing stop codon
Platyhelminthes	Minona ileanae	Mile-ap3b	MK854814	GRK-rich region	Pjeta et al. 2019	Transcriptomics + ISH + RNAi knockout
Platyhelminthes	Minona ileanae	Mile-ap4	MK854815	Proline-rich region	Pjeta et al. 2019	Transcriptomics + ISH + RNAi knockout
Arthropoda	Megabalanus rosa (barnacle)	CP-100k	AB033942.1	None	Kamino et al. 2000	Proteomics +
Arthropoda	Amphibalanus amphitrite (barnacle)	CP-100k homolog	AGS19349.1		Chen et al. 2011	Transcriptomics
Arthropoda	Pollicipes pollicipes (barnacle)	CP-100k homolog	ATB53757.1		Rocha et al. 2019	PCR + proteomics
Arthropoda	Megabalanus rosa	CP-52k	AB623048.1		Kamino et al. 2012	Proteomics + recombinant expression + Western blotting
Arthropoda	Amphibalanus amphitrite	CP-52k homolog	AKZ20820.1		Wang et al. 2015	Transcriptomics
Arthropoda	Pollicipes pollicipes	CP-52k homolog			Rocha et al. 2019	PCR + proteomics
Arthropoda	Amphibalanus amphitrite	Aacp-114k	KP863707		Wang et al. 2015	Transcriptomics + Proteomics
Arthropoda	Megabalanus rosa & Amphibalanus amphitrite	CP-68k (= AaCP-43k)	Not available; KY285984.1		So et al. 2016	Transcriptomics + Proteomics
Arthropoda	Megabalanus rosa	CP-20k	BAB18762.1	High Cys content	Kamino et al. 2001; Mori et. al 2007	Proteomics + Recombinant expression + functional assay
Arthropoda	Balanus albicostatus (=Fistulobalanus albicostatus) (barnacle)	CP-20k homolog	BAF96022.1	High Cys content	Mori et. al 2007	Proteomics + Recombinant expression + functional assay
Arthropoda	Amphibalanus amphitrite	CP-20k homolog	AFX74689.1 & AFX74690.1	High Cys content	Chen et al. 2011	Transcriptomics + ISH
Arthropoda	Megabalanus rosa	CP-19k	AB242294.1		Urushida et al. 2007	Recombinant expression + functional assay
Arthropoda	Amphibalanus amphitrite	CP-19k homolog	KP863708		Wang et al. 2015	Transcriptomics
Arthropoda	Amphibalanus amphitrite	SIPC	AAR33079.1
Annelida	Phragmatopoma californica	Pc-1	AAY29115.1		Endrizzi et al. 2009; Wang and Stewart 2012
Annelida	Phragmatopoma californica (sandcastle worm)	Pc-2	AAY29116.1
Annelida	Phragmatopoma californica	Pc-3A variant 1	AAY29117.1	Ser-rich
Annelida	Phragmatopoma californica	Pc-3A variant 2	AAY29118.1	Ser-rich
Annelida	Phragmatopoma californica	Pc-3A variant 3	AAY29119.1	Ser-rich
Annelida	Phragmatopoma californica	Pc-3B variant 1	AAY29120.1	Ser-rich
Annelida	Phragmatopoma californica	Pc-3B variant 2	AAY29121.1	Ser-rich
Annelida	Phragmatopoma californica	Pc-3B variant 3	AAY29122.1	Ser-rich
Annelida	Phragmatopoma californica	Pc-3B variant 4	AAY29123.1	Ser-rich
Annelida	Phragmatopoma californica	Pc-4	GH160602
Craniata	Gasterosteus aculeatus (fish)	Spiggin alpha	AAK15297.1	VWD, C8, TIL	Jones et al. 2001
Craniata	Gasterosteus aculeatus	Spiggin beta	AAK15298.1	VWD, C8, TIL	Jones et al. 2001
Craniata	Gasterosteus aculeatus	Spiggin gamma	AAK15299.1	VWD, C8, TIL	Jones et al. 2001
Mollusca	Dreissena polymorpha (zebra mussel)	Dpfp1	AAF75279
Mollusca	Dreissena polymorpha	Dpfp2	AM229730
Mollusca	Mytilus californianus (mussel)	Mfp-3S	AAZ94729.1
Mollusca	Mytilus californianus	Mcfp-5	ABE01084.1
Mollusca	Mytilus californianus	Mcfp-6	ABC84186.1
Mollusca	Mytilus edulis (mussel)	Mefp-1	AAX23968.1
Mollusca	Mytilus edulis	Mefp-2	AAX23970.1	EGF
Mollusca	Mytilus edulis	Mefp-3	AAF89278.1
Mollusca	Mytilus edulis	Mefp-5	AAL35297
Mollusca	Mytilus galloprovincialis (mussel)	Mgfp-1	BAA09851.1
Mollusca	Mytilus galloprovincialis	Mgfp-5	AAS00463.1
Mollusca	Perna viridis (green mussel)	Pvfp-1	AAY46226
Mollusca	Perna viridis	Pvfp-2	AGZ84282
Mollusca	Perna viridis	Pvfp-3	AGZ84285
Mollusca	Perna viridis	Pvfp-5	AGZ84279
Mollusca	Perna viridis	Pvfp-6	AGZ84283
Mollusca	Patella vulgata (limpet)	P-vulgata_1	QKY77465.1	vWFD, C-type lectin-like, EGF, cystine-knot C- terminal, KSPI	Kang et al. 2020	Transcriptomics + proteomics + ISH	Start codon missing
Mollusca	Patella vulgata	P-vulgata_3	QKY77467.1	C8 domain, vWFD, TIL, LDLrA	Kang et al. 2020	Transcriptomics + proteomics + ISH	Start & stop codon missing
Mollusca	Patella vulgata	P-vulgata_4	QKY77468.1	vWFD	Kang et al. 2020	Transcriptomics + proteomics + ISH	Stop codon missing
Mollusca	Patella vulgata	P-vulgata_7	QKY77471.1	Chitin binding type II	Kang et al. 2020	Transcriptomics + proteomics + ISH	Y
